# Supplementary material for: Highly selective colorimetric detection of cyanide anions in aqueous media by triphenylamine and phenanthro(9,10-d)imidazole based probes
Source: Royal Society of Chemistry journal article supplement (doi:10.1039/c6pp00345a), 2016-12-14
Supplement: c6pp00345a1.pdf [file c6pp00345a1.pdf]

## Highly selective colorimetric detection of cyanide anion in aqueous media by triphenylamine and phenanthro(9,10-d)imidazole based probes

Arockiam Jesin Beneto and Ayyanar Siva

School of Chemistry, Madurai Kamaraj University, Madurai-21, Tamilnadu, India. E-mail:  
drasiva@gmail.com; ptcsva@yahoo.co.in; Tel: +91451-2458471.

| S. No | Table of Contents                                                                           | Page No |
|-------|---------------------------------------------------------------------------------------------|---------|
| 1.    | Experimental procedure                                                                      | 2       |
| 2.    | UV-visible spectrum of TPC upon the addition of various anions (Figure S1)                  | 3       |
| 3.    | Linear plot of absorbance of TPC Vs. Various concentration of $\text{CN}^-$ (Figure S2)     | 3       |
| 3.    | UV-visible spectrum of PITP upon the addition of various anions (Figure S3)                 | 4       |
| 4.    | Jobs plot of PITP Vs. $\text{CN}^-$ (Figure S4)                                             | 4       |
| 5.    | Linear plot of absorbance Vs. Various concentration of $\text{CN}^-$ (Figure S5)            | 4       |
| 6.    | Fluorescence spectrum of PITP upon the addition of various anions (Figure S6)               | 5       |
| 7.    | $^1\text{H}$ , $^{13}\text{C}$ , ESI-LCMS spectrum of 2, TPC, 2a, PIT, PITP (Figure S7-S17) | 5-14    |

## Experimental procedure:

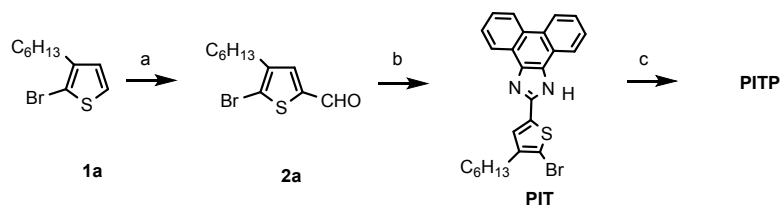

**Scheme S1** (a) POCl<sub>3</sub>, DMF, EDC, 80°C, (yield 95%) (b) 9,10-phenanthroquinone, NH<sub>4</sub>OAc, AcOH, 120°C, (yield 90%) (c) 4-vinylpyridine, Pd(OAc)<sub>2</sub>, DMF, 120°C, TBAB, K<sub>2</sub>CO<sub>3</sub>, (yield 45%).

### Synthesis of 2-bromo-3-hexyl-5-carbaldehyde (2a)<sup>1</sup>

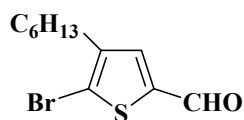

Mixture of phosphorous oxychloride 12.24 ml (48.6 mmol) and dimethylformamide 5.84 ml (84.7 mmol) cooled to 0°C and 2-bromo-3-hexyl-thiophene 0.8 ml (4.0 mmol) in 10 ml ethylene dichloride was added drop wise over 10 minutes into the reaction mixtures. Then heated to 80°C for about 8 hrs. The reaction mass was quenched with ice cooled water and neutralized with sodium hydroxide and extracted with ethylacetate three times. Further, the organic layer was washed with brine and water dried over sodium sulfate and solvent was distilled over reduced pressure to give a dark brown solid, which was further purified by column chromatography using (9:1) pet ether and ethylacetate as an eluent. Yellow oily liquid was obtained; yield is 95%. <sup>1</sup>H NMR (300 MHz, CDCl<sub>3</sub>) δ: 9.78 (s, 1H), 7.52 (s, 1H), 2.60 (t, *J* = 9 Hz, 2H, ), 1.63-1.58 (m, 2H), 1.2-1.5 (m, 6H), 0.89 (t, *J* = 6.6Hz, 3H).

### Synthesis of 2-(5-bromo-4-hexylthiophen-2-yl)-1H-phenanthro(9,10-d)imidazole (PIT)<sup>1</sup>

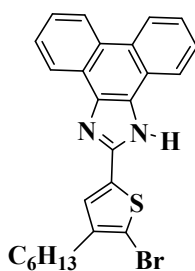

2-bromo-3-hexyl-5-carbaldehyde 1.0 g (3.6 mmol) and 9,10-phenanthroquinone 0.9 g (3.6 mmol) was dissolved in acetic acid 20 ml and added ammonium acetate 1.3 g (16.8 mmol) into the reaction flask and the reaction mass was reflux for about 12 hrs, the reaction mass was quenched with crushed ice to give orange solid which was filtered and washed with hot dichloromethane to give a product as an off-white solid. Yield is 90% (m.p. 220 °C). <sup>1</sup>H NMR (300 MHz, DMSO) δ 13.56 (s, 1H), 8.88 (t, *J* =

9 Hz, 2H), 8.48 (d,  $J = 6.0$  Hz, 1H), 8.41(d,  $J = 9.0$  Hz, 1H), 7.78 – 7.62 (m, 5H), 2.62 (t,  $J = 9.0$  Hz, 2H), 1.67-1.62(t, 2H), 1.5-1.2 (m, 6H), 0.89 (t,  $J = 6.6$  Hz, 3H). ESI-MS  $m/z$  calcd for  $C_{25}H_{23}BrN_2S:[M]^+$  464.07, Found; LCMS-ESI  $[M-H]^+ = 463.19$   $m/z$ . Elemental Anal. Calcd for  $C_{25}H_{23}BrN_2S$ : C, 64.79; H, 5.00; N, 6.04, S, 6.92; Found: C, 64.75; H, 4.98; N, 6.07, S, 6.88%.

## References

1. A. Jesin Beneto, V. Thiagarajan, and A. Siva, A Tunable Ratiometric pH Sensor Based on Phenanthro[9,10-d]imidazole covalently linked with vinylpyridine, *RSC Advances*, **2015**, 5, 67849–67852

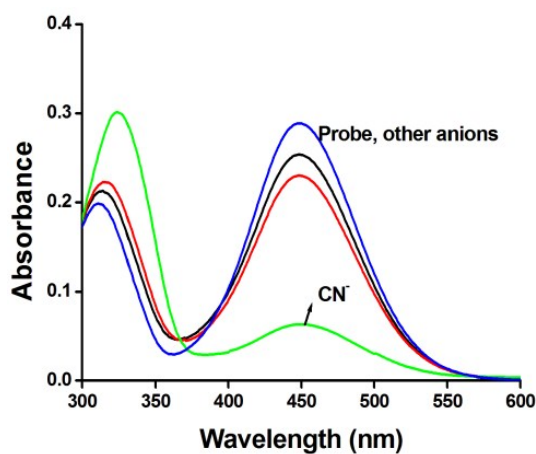

Figure S1. UV-visible spectra of TPC (10 μM) upon the addition of various anions.

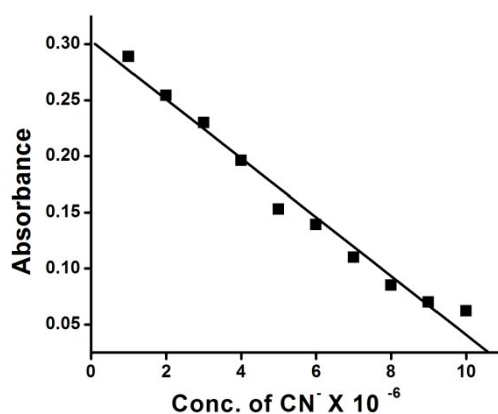

Figure S2. Linear plot of change in absorbance at 460 nm of TPC (10 μM) Vs. Various concentration of CN⁻ 1-10 μM.

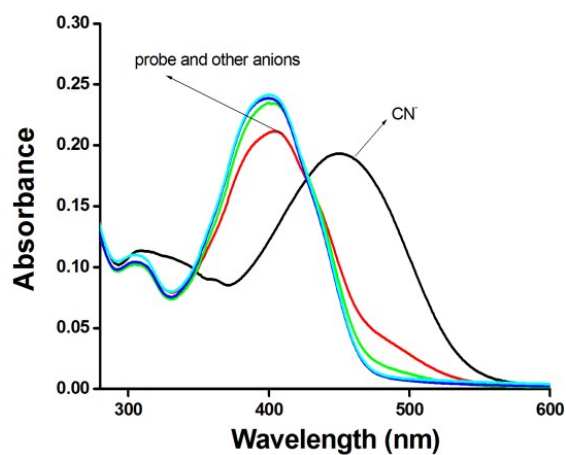

Figure S3. UV-visible spectra of PITP(10  $\mu\text{M}$ ) upon the addition of various anions.

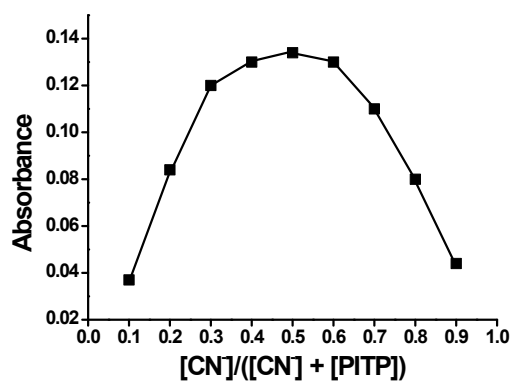

Figure S4. Jobs plot of PITP Vs.  $\text{CN}^-$ .

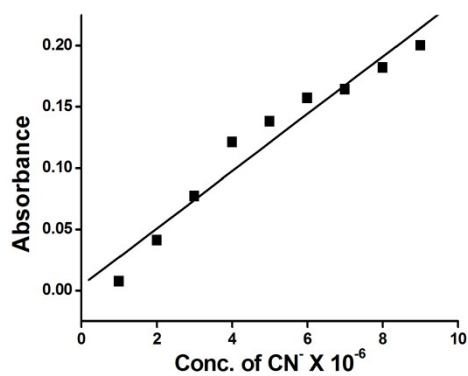

Figure S5. Linear plot of change in absorbance at 460 nm of PITP(10  $\mu\text{M}$ ) Vs. Various concentration of  $\text{CN}^-$  (1-10  $\mu\text{M}$ ).

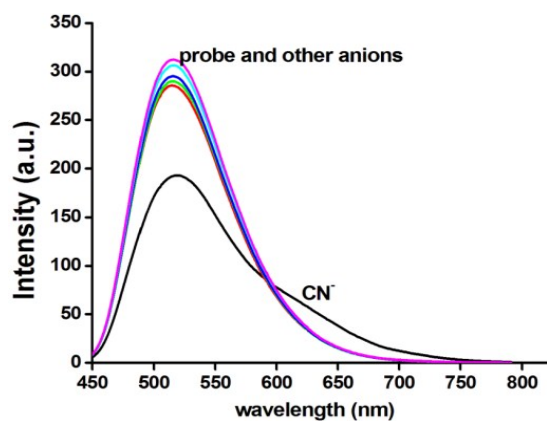

Figure S6. Fluorescence spectrum of PITP (10  $\mu$ M) upon the addition of various anions, excited at 450 nm.

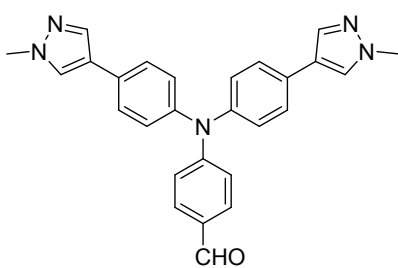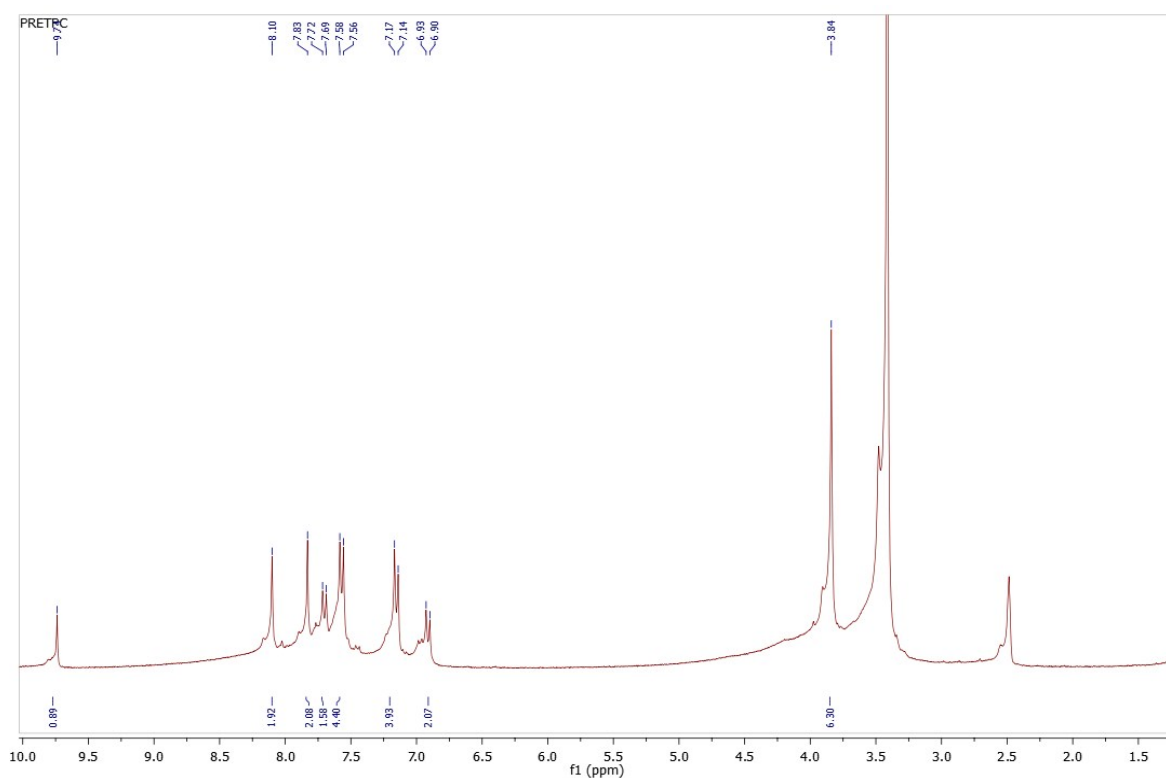

Figure S7.  $^1\text{H}$  NMR spectrum of 4-(bis(4-(1-methyl-1H-pyrazol-4-yl)phenylamino)

benzaldehyde (2).

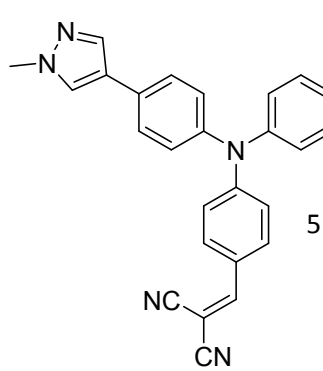

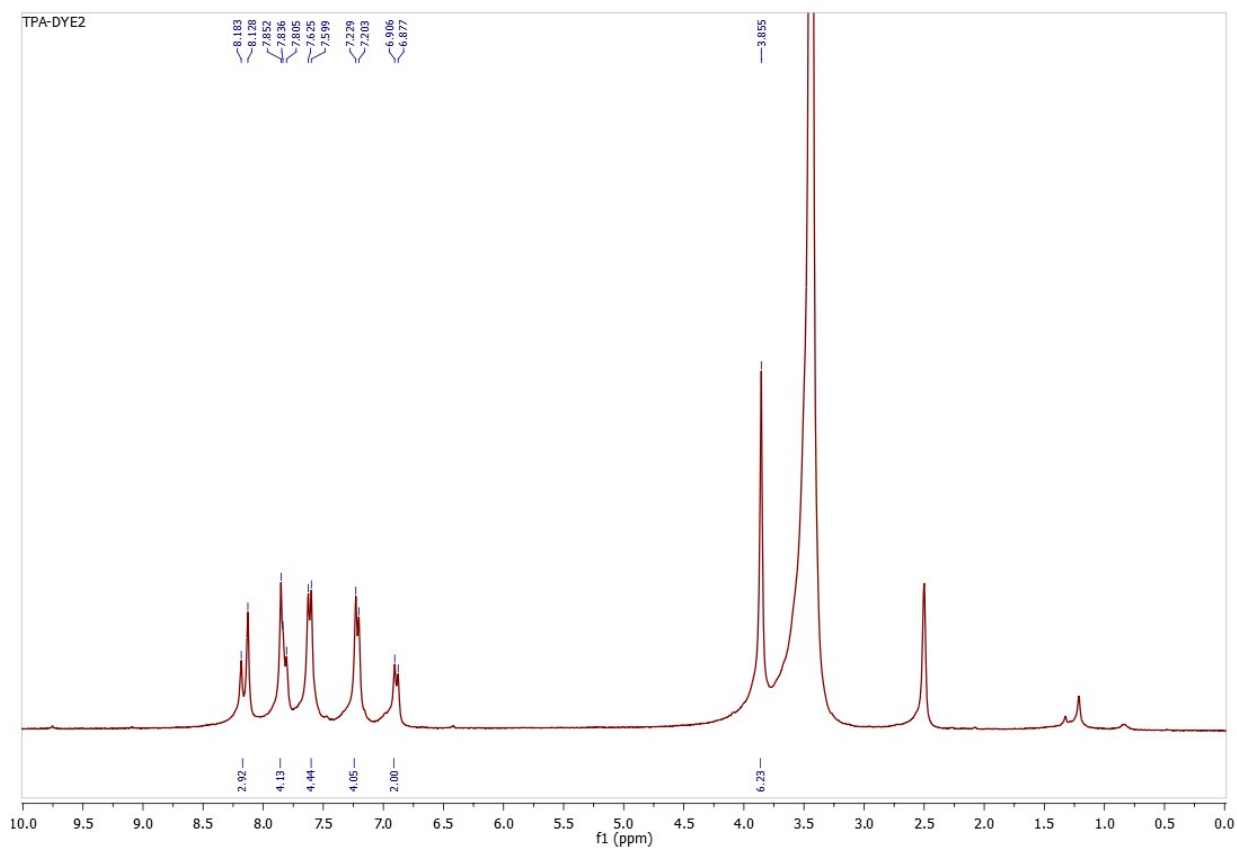

Figure S8.  $^1\text{H}$  NMR spectrum of (2-(4-bis(4-(1-methyl-1H-pyrazol-4-yl)phenyl)amino)benzylidene)malononitrile) TPC.

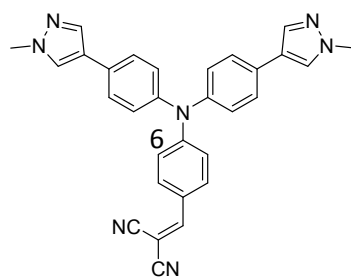

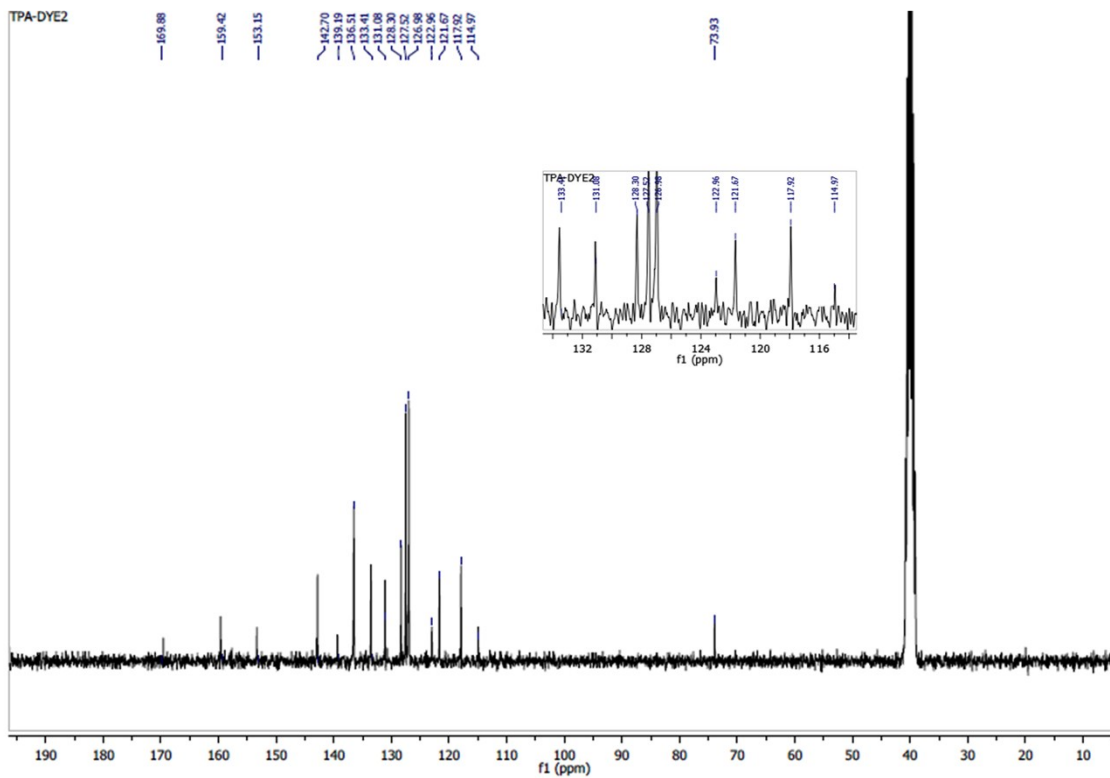

Figure S9.  $^{13}\text{C}$  NMR spectrum of (2-(4-bis(4-(1-methyl-1H-pyrazol-4-yl)phenyl)amino)benzylidene)malononitrile) TPC.

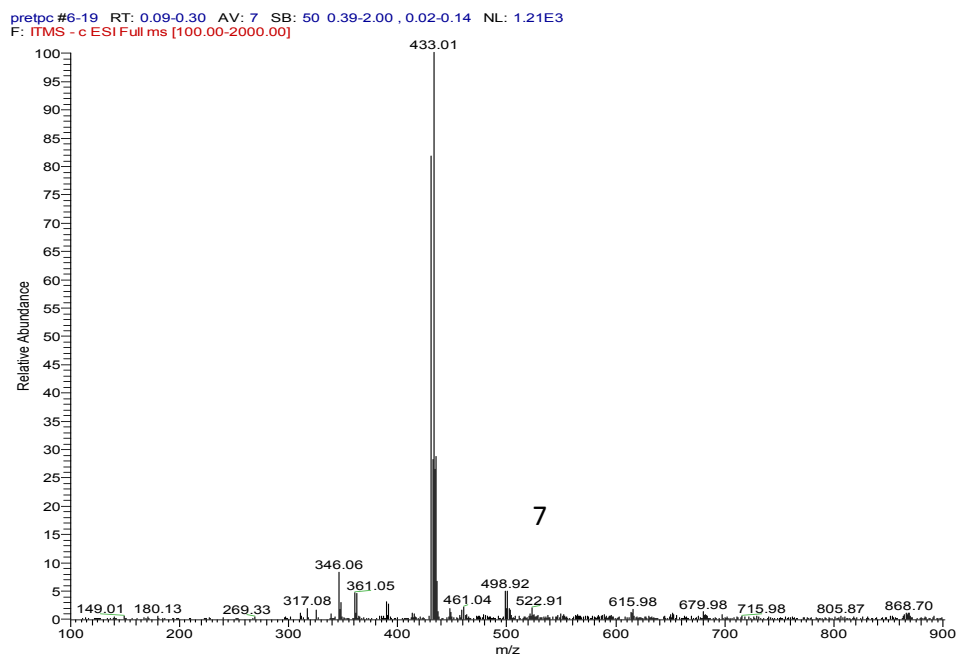

Figure S10. ESI-LCMS spectrum of 4-(bis(4-1-methyl-1H-pyrazol-4-yl)phenylamino) benzaldehyde (2).

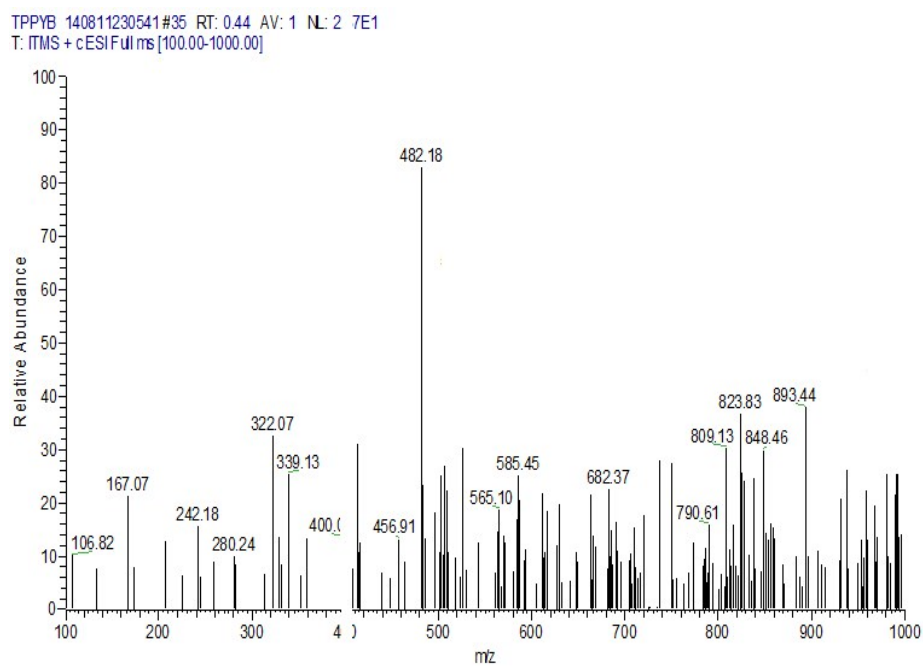

Figure S11. ESI-LCMS spectrum of (2-(4-bis(4-(1-methyl-1H-pyrazol-4-yl)phenyl)amino)benzylidene)malononitrile) (TPC).

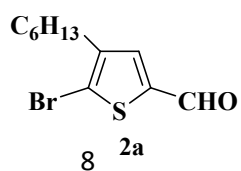



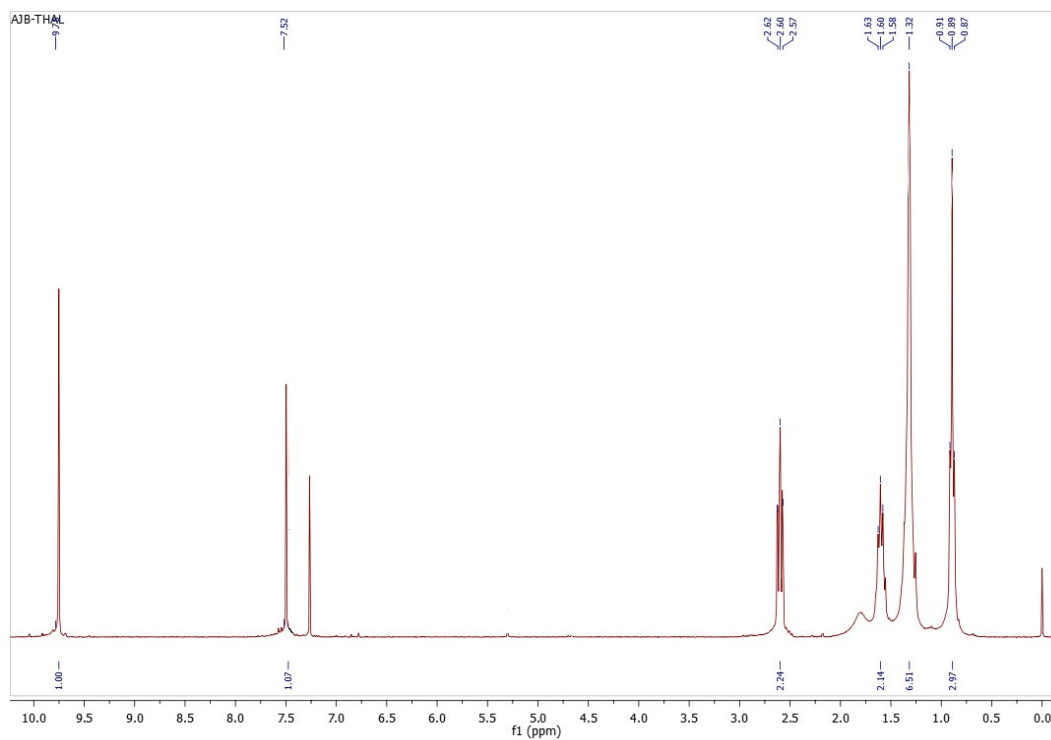

Figure S12.  $^1\text{H}$  NMR spectrum of 2-bromo-3-hexyl-5-carbaldehyde (2a)

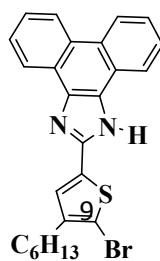

PIT

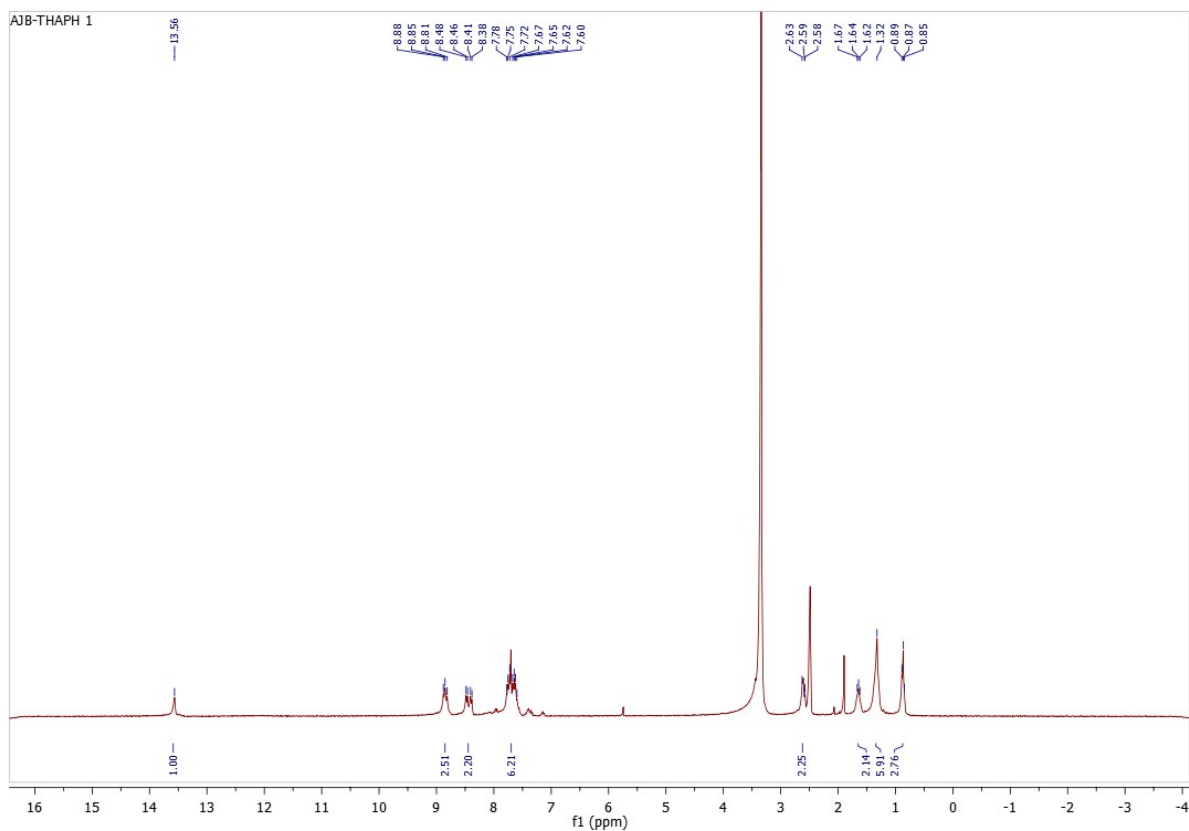

Figure S13.  $^1\text{H}$  NMR spectrum of 2-(5-bromo-4-hexylthiophen-2-yl)-1H-phenanthro(9,10-d)imidazole (PIT).

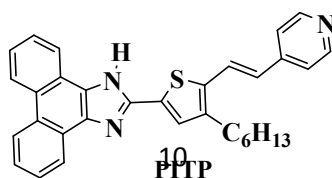

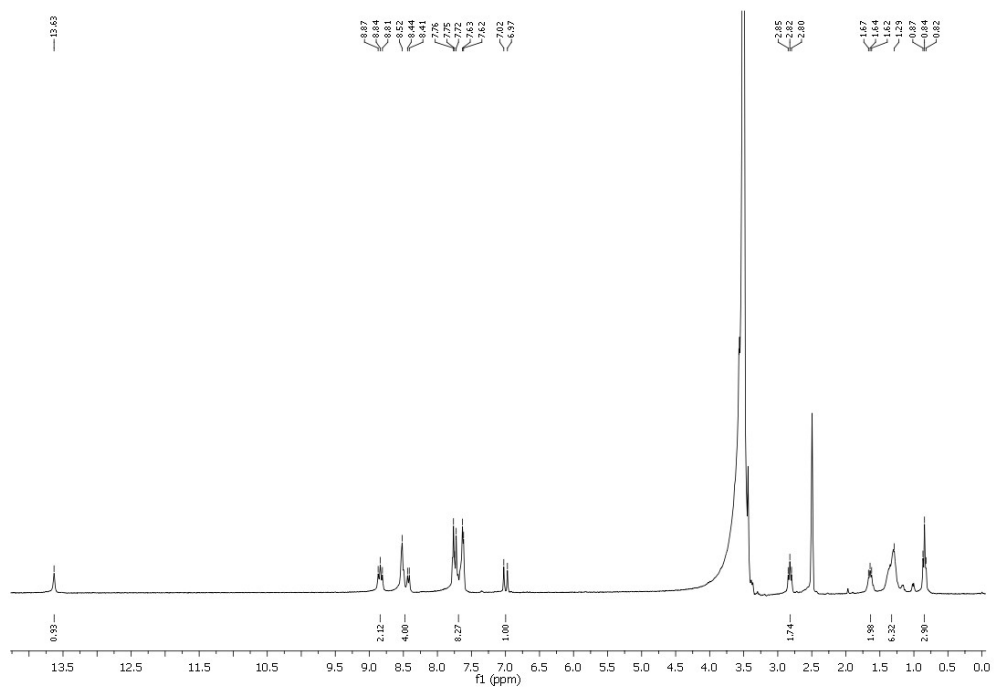

Figure S14.  $^1\text{H}$  NMR spectrum of (E)-2-(4-hexyl-5-(2-(pyridin-4-yl)vinyl)thiophen-2-yl)-1H-phenanthro[9,10-d]imidazole (PITP)

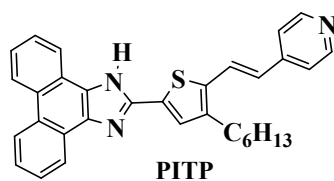

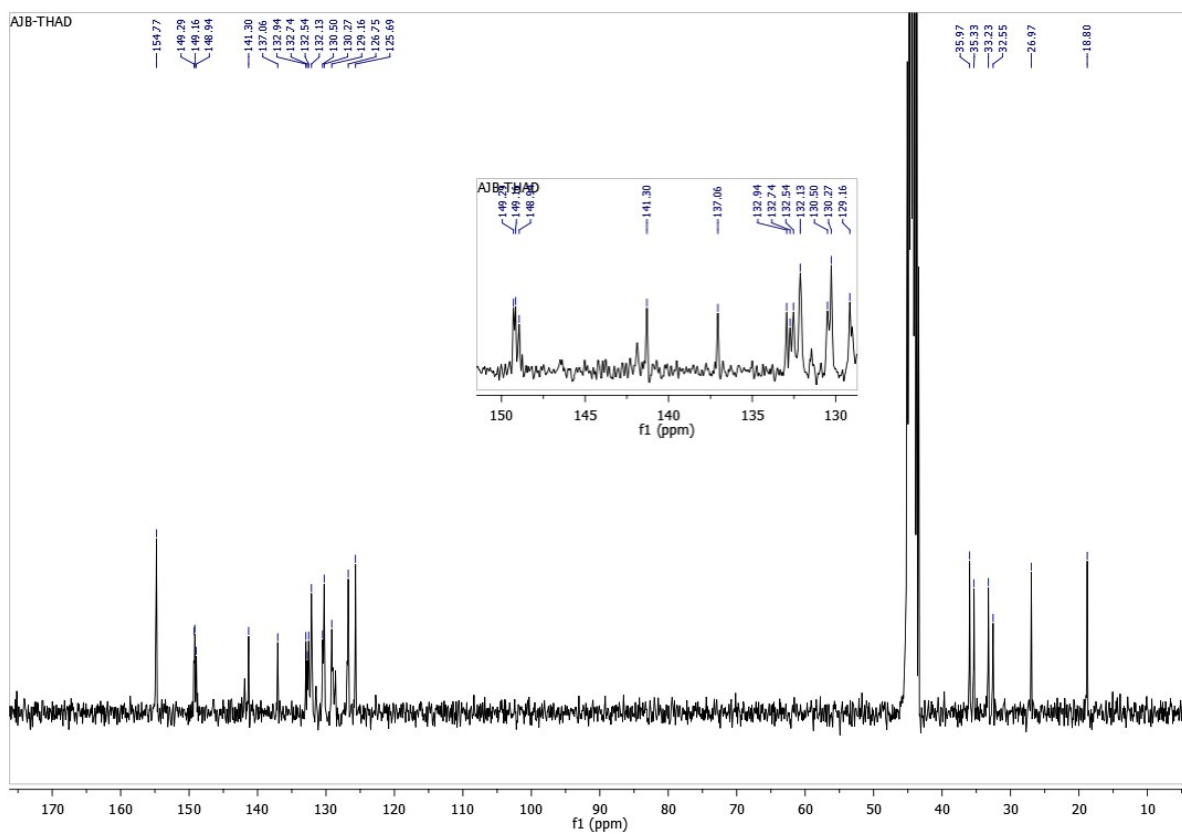

Figure S15.  $^{13}\text{C}$  NMR spectrum of (E)-2-(4-hexyl-5-(2-(pyridin-4-yl)vinyl)thiophen-2-yl)-1H-phenanthro[9,10-d]imidazole (PITP).

463\_140510234149 (2)#37 RT: 0.44 AV: 1 NL: 1.56E3  
T: ITMS + c ESI Full ms [100.00-1000.00]

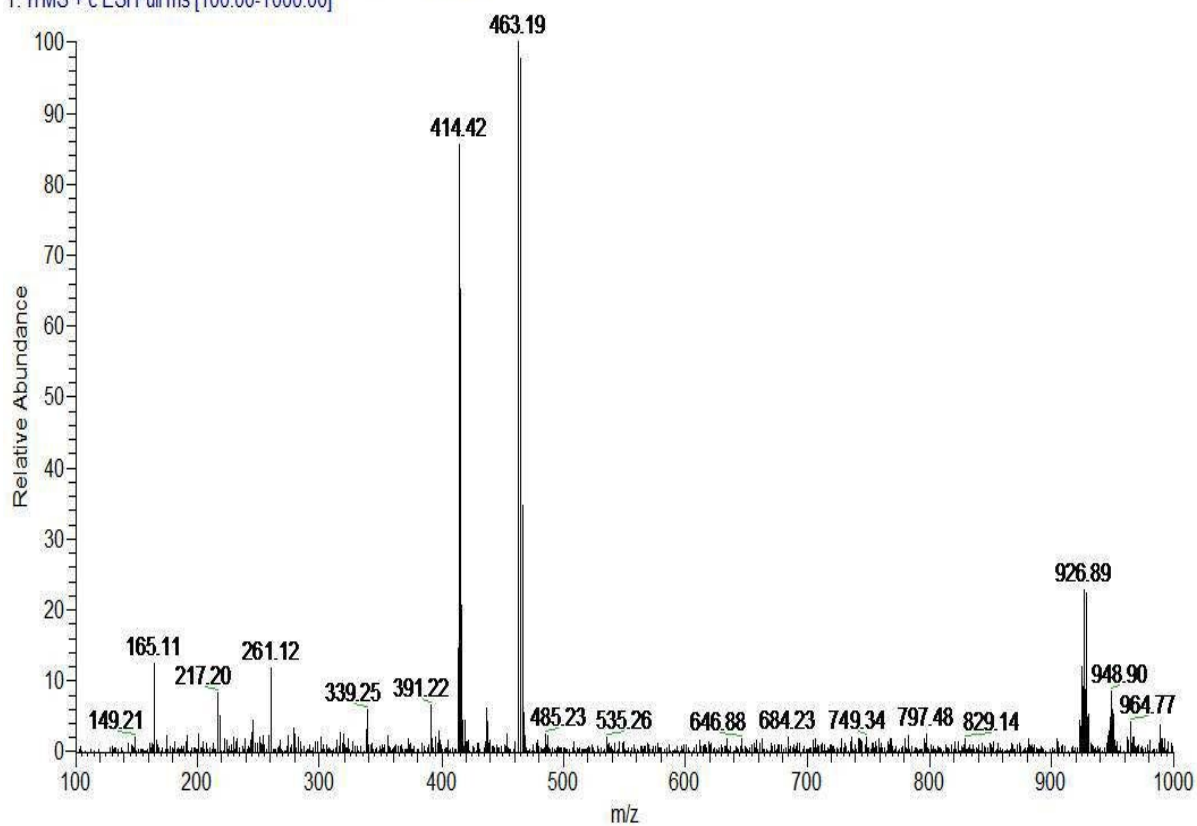

Figure S16. ESI-LCMS spectrum of 2-(5-bromo-4-hexylthiophen-2-yl)-1H-phenanthro(9,10-d)imidazole (PIT)

A87\_140510234149 (1) #28 RT: 0.33 AV: 1 NL: 1.58E3  
T: ITMS + c ESI Full ms [100.00-1000.00]

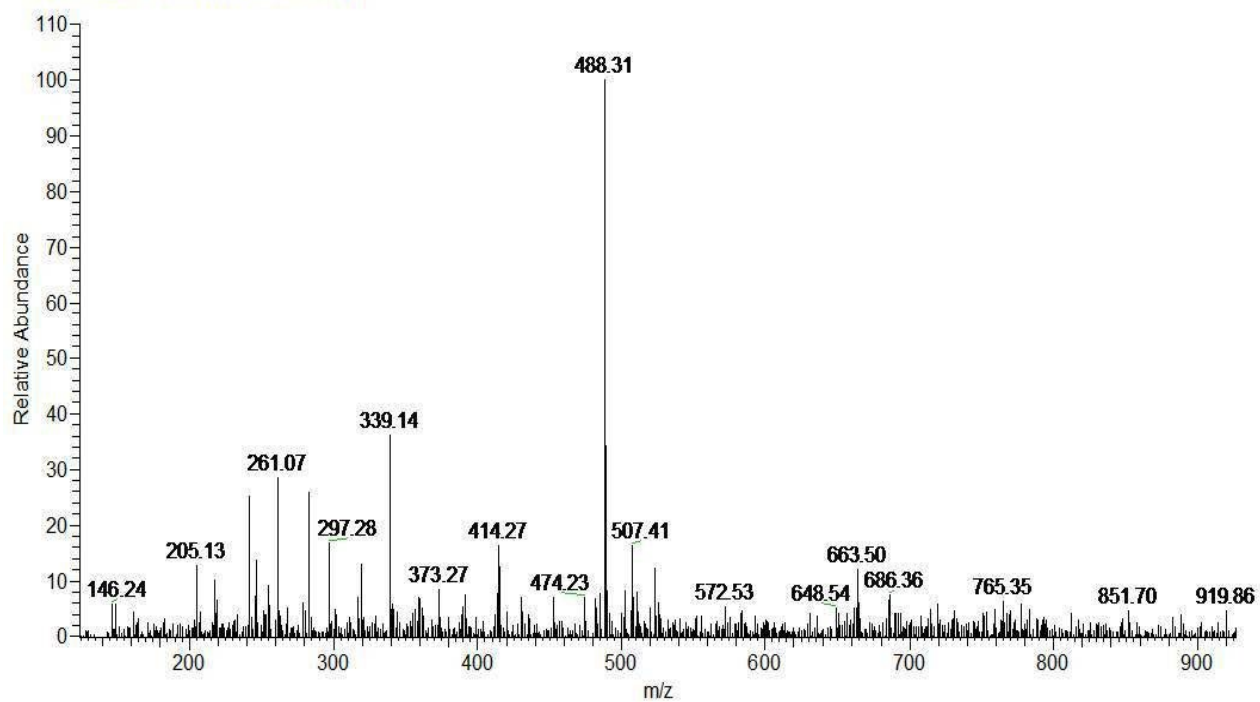

Figure S17. ESI-LCMS spectrum of (E)-2-(4-hexyl-5-(2-(pyridin-4-yl)vinyl)thiophen-2-yl)-1H-phenanthro[9,10-d]imidazole (PITP).
